# Supplementary material for: Antibody-free digital influenza virus counting based on neuraminidase activity
Source: PubMed Central journal article supplement (PMC6355933; doi:10.1038/s41598-018-37994-6), 2019-01-31
Supplement: 41598_2018_37994_MOESM1_ESM.pdf [file 41598_2018_37994_MOESM1_ESM.pdf]

**Title**

Antibody-free digital influenza virus counting based on neuraminidase activity

**Authors**

\*#Kazuhito V. Tabata<sup>1,2</sup>, #Yoshihiro Minagawa<sup>1</sup>, Yuko Kawaguchi<sup>1</sup>, Mana Ono<sup>1</sup>, Yoshiki Moriizumi<sup>1</sup>, Seiya Yamayoshi<sup>3</sup>, Yoichiro Fujioka<sup>5</sup>, Yusuke Ohba<sup>5</sup>, Yoshihiro Kawaoka<sup>3,4</sup>, and \*Hiroyuki Noji<sup>1,2</sup>

#These authors contributed equally.

**Affiliations**

<sup>1</sup>Department of Applied Chemistry, The University of Tokyo, 7-3-1 Hongo, Bunkyo-ku, Japan

<sup>2</sup>ImPACT Program, Cabinet Office, Government of Japan, Chiyoda-ku Tokyo 100-8914, Japan

<sup>3</sup>Division of Virology, Department of Microbiology and Immunology, Institute of Medical Science, University of Tokyo, Minato-ku, Tokyo 108-8639, Japan

<sup>4</sup>Department of Pathobiological Sciences, School of Veterinary Medicine, University of Wisconsin-Madison, Madison, Wisconsin 53711, USA

<sup>5</sup>Department of Cell Physiology, Faculty of Medicine and Graduate School of Medicine, Hokkaido University, N15 W7, Kita-ku, Sapporo, Japan

**\*Corresponding authors**

Hiroyuki Noji and Kazuhito V. Tabata

Department of Applied Chemistry, The University of Tokyo,  
7-3-1 Hongo, Bunkyo-ku, Japan

tel. +81-3-5841-7252

fax. +81-3-5841-1872

email : [hnoji@appchem.t.u-tokyo.ac.jp](mailto:hnoji@appchem.t.u-tokyo.ac.jp)

[kazuhito@nojilab.t.u-tokyo.ac.jp](mailto:kazuhito@nojilab.t.u-tokyo.ac.jp)

## Supplemental Figures and Table

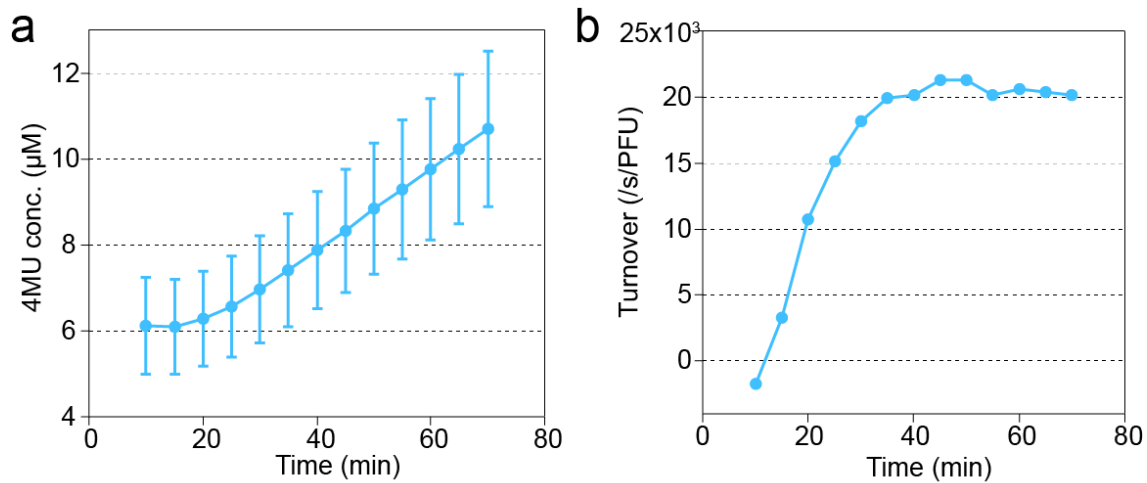

### Supplemental Fig. 1. Fluorogenic assays of influenza virus in solution

**a**, Time courses of the fluorogenic assay of influenza virus. The reaction was measured in solution with the plate reader. The sample was influenza type A virus (A/PR/8/1934(H1N1)) at  $1.0 \times 10^7$  PFU/mL mixed with 1 mM MUNANA. **b**, The determined turnover rate from the time course of (a).

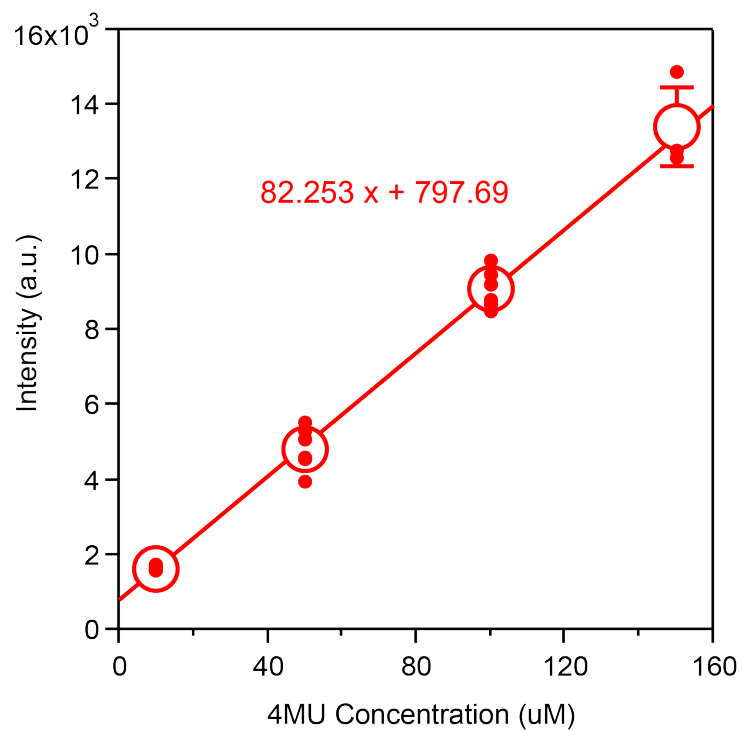

**Supplemental Fig. 2. Calibration curve of 4-MU.**

4-MU solution was partitioned into FRAD at the indicated concentrations. The fluorescent intensity of droplet reactors was determined under the measurement condition as same as in DIViC.

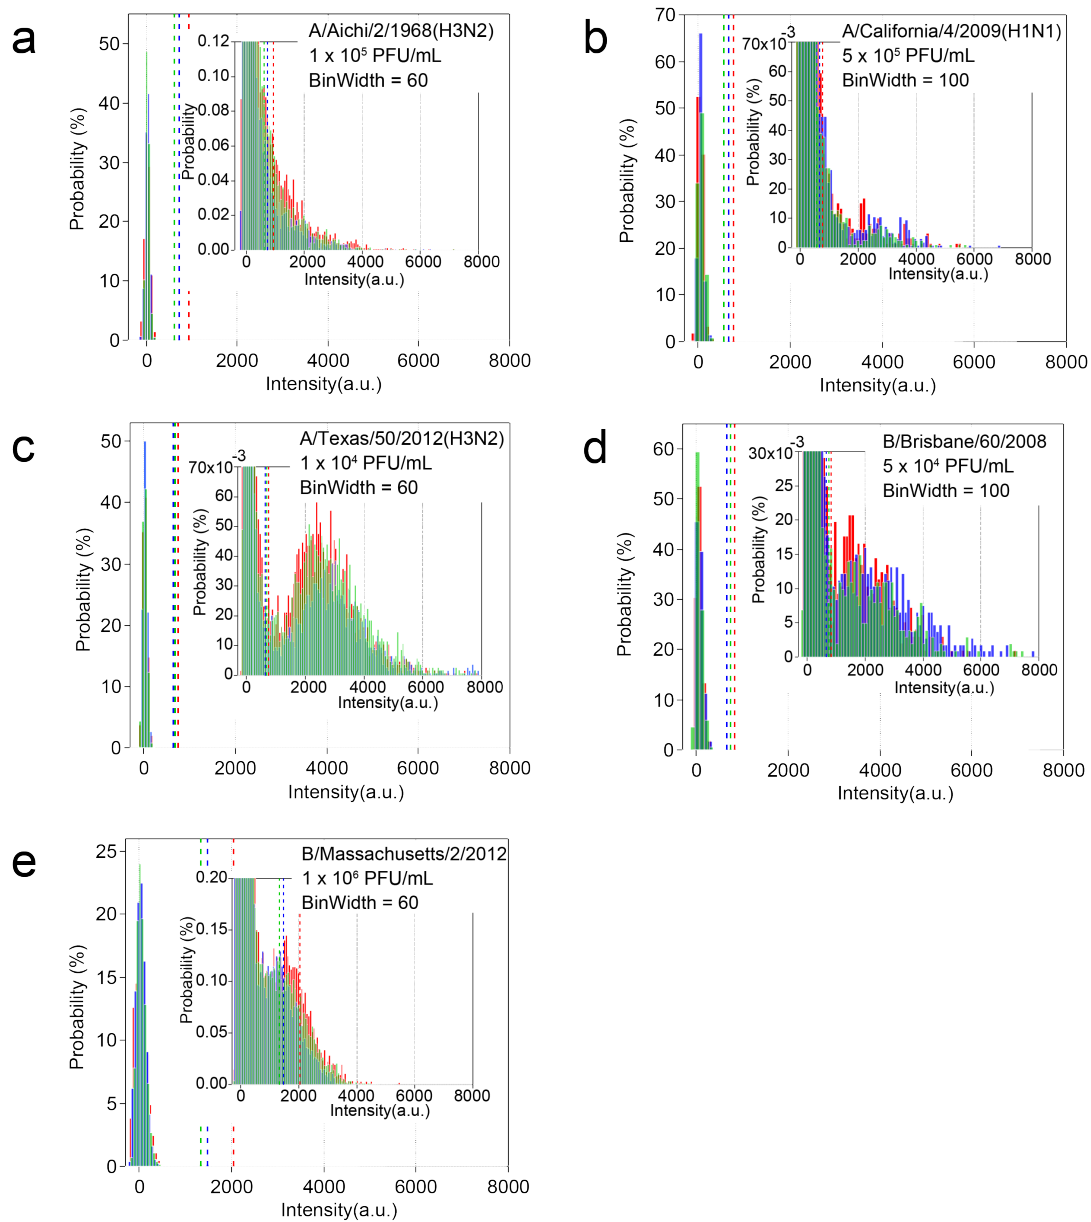

**Supplemental Fig. 3. DIViC of various types and subtypes of influenza virus**

Distribution of the fluorescence intensity of reactors from three replicates. The top-right insets show the expanded graph. **a**, A/Aichi/2/1968(H3N2),  $1.0 \times 10^6$  PFU/mL. **b**, A/California/4/2009(H1N1),  $5.0 \times 10^5$  PFU/mL. **c**, A/Texas/50/2012(H3N2),  $1.0 \times 10^4$  PFU/mL. **d**, B/Brisbane/60/2008 (Victoria lineage),  $1.0 \times 10^6$  PFU/mL. **e**, B/Massachusetts/2/2012 (Yamagata lineage),  $5.0 \times 10^4$  PFU/mL.

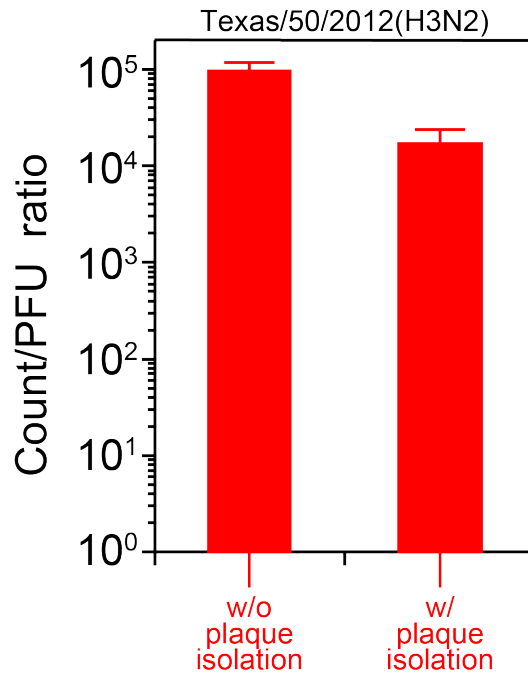

**Supplemental Fig. 4. CTPR of H3N2 depending on the preparation procedures**

Count-to-PFU ratio (CTPR) of Texas/50/2012 strain was determined for the preparation with or without plaque isolation. In 'w/o' preparation, a confluent MDCK cells on a dish plate were directly infected with a stock sample of Texas/50/2012, and the supernatant of the culture medium was recovered for analysis as same as for other strains. This preparation gave a large CTPR (left). In 'w/' preparation, the stock sample was firstly used for plaque assay with MDCK cells. A virus sample was recovered from a single plaque, and then used for the virus preparation. This preparation gave almost 10-time lower CTPR (right) and shown in the Fig. 3c.

**Supplemental table 1. CTPR of PR8 reported in literatures**

Literatures were surveyed that reported count-to-PFU ratio (CTPR) of A/PR/8/34 (PR8) strain for the comparison with the present study. The reported values for other subtypes were also provided.

| Reference                                                                                     | Virus type                 | Count to PFU ratio | Method for particle counting |
|-----------------------------------------------------------------------------------------------|----------------------------|--------------------|------------------------------|
| van Elden, L. J. R., et. al. Journal of Clinical Microbiology 39, 196-200, (2001).<br>Ref. 36 | A/PR/ 8/34 (H1N1)          | <b>750</b>         | Electron microscopy (EM)     |
|                                                                                               | B/Lee/ 40                  | <b>2357</b>        | EM                           |
| Transfiguracion, J., et. al. Vaccine 33, 78-84, (2015).<br>Ref. 37                            | A/Wilson Smith/1933 (H1N1) | <b>2</b>           | EM                           |
|                                                                                               | B/Lee/1940                 | <b>&gt; 50</b>     | EM                           |
|                                                                                               | A/Aichi/2/68 H3N2          | <b>&gt; 50</b>     | EM                           |
|                                                                                               | A/Hong Kong/8/1968 (H3N2)  | <b>&gt; 50</b>     | EM                           |
| Ward, C. L. et al. Journal of Clinical Virology 29, 179-188, (2004).<br>Ref. 38               | A/PR/8/34 (H1N1)           | <b>3</b>           | EM                           |
|                                                                                               | A/Shangdong/3/93 (H3N2)    | <b>204</b>         | Real time qPCR               |
|                                                                                               | A/Taiwan/1/86 (H1N1)       | <b>2381</b>        | Real time qPCR               |
| Enoki, S. et al. PLoS One 7, e49208, (2012).<br>Ref. 39                                       | B/Lisbon/3/96              | <b>9091</b>        | Real time qPCR               |
|                                                                                               | A/PR/8/34 (H1N1)           | <b>&lt; 2000</b>   | TIRFM and SEM                |
| K.H. Chan, et.al. J Clin Virol, 45, 3,2009<br>Ref. 40                                         | A/HK/415742/09 (H1N1)      | <b>909</b>         | Real time qPCR               |
|                                                                                               | A/California/4/09 (H1N1)   | <b>591</b>         | Real time qPCR               |
|                                                                                               | A/HK/403946/09 (H1N1)      | <b>591</b>         | Real time qPCR               |
| Noton et al. J Virol, (2009)<br>Ref. 41                                                       | A/PR/8/34 (H1N1)           | <b>8</b>           | EM                           |
|                                                                                               | A/PR/8/34 (H1N1)           | <b>37</b>          | EM                           |
|                                                                                               | A/PR/8/34 ts and NP mutant | <b>500</b>         | EM                           |
|                                                                                               | A/PR/8/34 ts and NP mutant | <b>1481</b>        | EM                           |

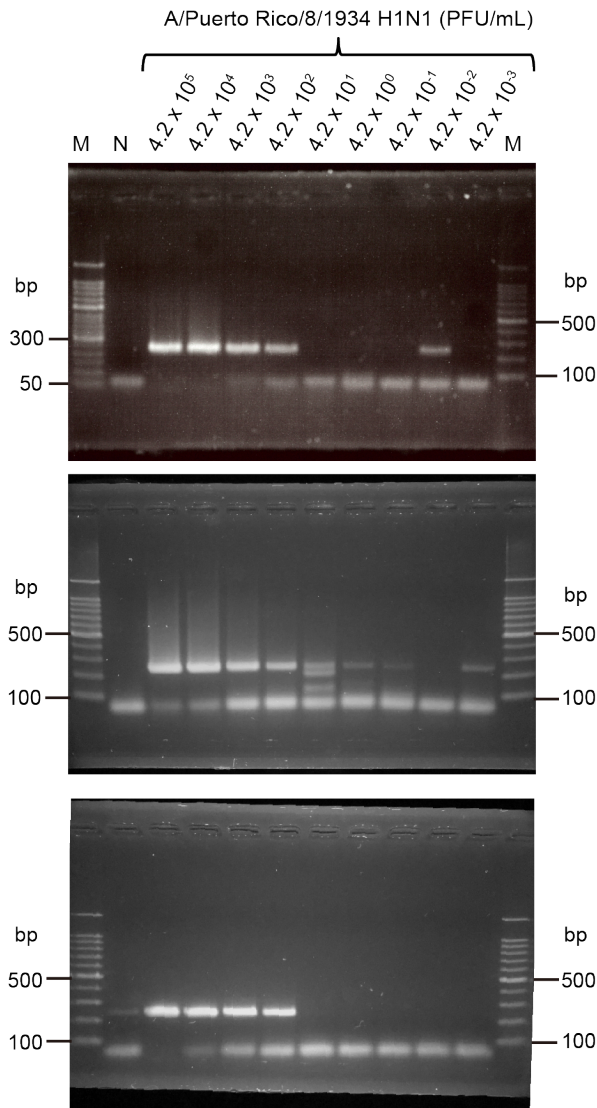

### Supplemental Fig. 5. Limit of detection for conventional reverse transcription PCR

Three independent replicates of the virus detection with reverse transcription PCR (RT-PCR). Three different full-length agarose gels showed the results of RT-PCR amplicons for detection of matrix protein (MP) gene of influenza. The gel images were taken by WAT-120N<sup>+</sup> (1<sup>st</sup> experiment) or iPhone Camera (2<sup>nd</sup>, 3<sup>rd</sup>) and converted to gray-scale by Adobe® illustrator® CC. RT-PCR amplification was done using the conventional RT-PCR protocol based on *WHO information for molecular diagnosis of influenza virus*. In that protocol, forward-primer (M30F1/08 : 5'-ATGAGYCTTYTAACCGAGGTCGAAACG-3') and reverse-primer (M264R3/08 : 5'-TGGACAAANCGTCTACGCTGCAG-3') were used to detect MP gene of influenza type A virus (A/PR/8/1934(H1N1)(PR8). Expected PCR product size was 244 bp. Products were analysed by 2 % agarose gel electrophoresis and SYBR safe<sup>TM</sup> gel staining. The PR8 strain was serially diluted 10-fold before extracting RNA. Lane 1, 50-bp (1<sup>st</sup> experiment) or 100-bp (2<sup>nd</sup>, 3<sup>rd</sup>) DNA ladder (TaKaRa, Japan). Lane 2, RNase free water. Lanes 3-11, serially diluted PR8 strain. Lane 12, 100-bp DNA ladder (TaKaRa). Although the second experiment detected virus at titre of  $4.2 \times 10^1$  or less, the result was not reproducible in 1<sup>st</sup> and 3<sup>rd</sup> experiments and non-specific amplification was observed in the second experiment. Considering the reliability, the detection limit in the present condition was judged as  $4.2 \times 10^2$ .

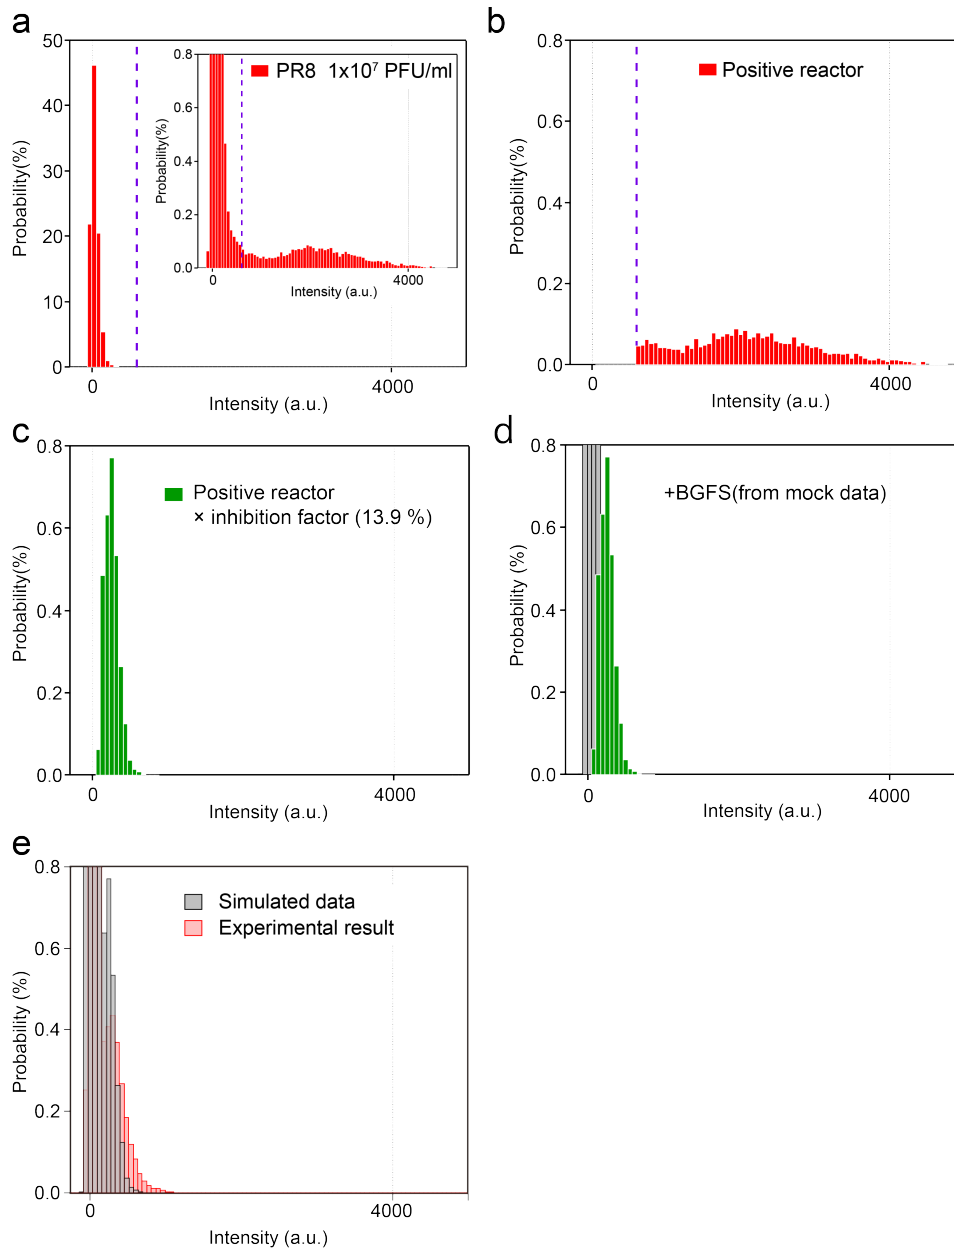

**Supplemental Fig. 6. Simulation procedure for oseltamivir inhibition**

**a.** The original distribution of PR8 at  $5.0 \times 10^6$  PFU/mL in the absence of oseltamivir. The dotted vertical line is the threshold to define positive reactors. **b.** Distribution after removing background fluorescence data in **a**. **c.** calculated distribution at 10 nM oseltamivir that is obtained by multiplying the extracted distribution (**b**) with the inhibition factor (13.9%) estimated from  $IC_{50}$  of 1.6 nM. **d.** the simulated distribution obtained from the calculated distribution plus the background fluorescence measured in mock sample. **e.** the comparison of the simulated distribution with the experimental data measured at 10 nM oseltamivir that is shown as Fig. 6b.



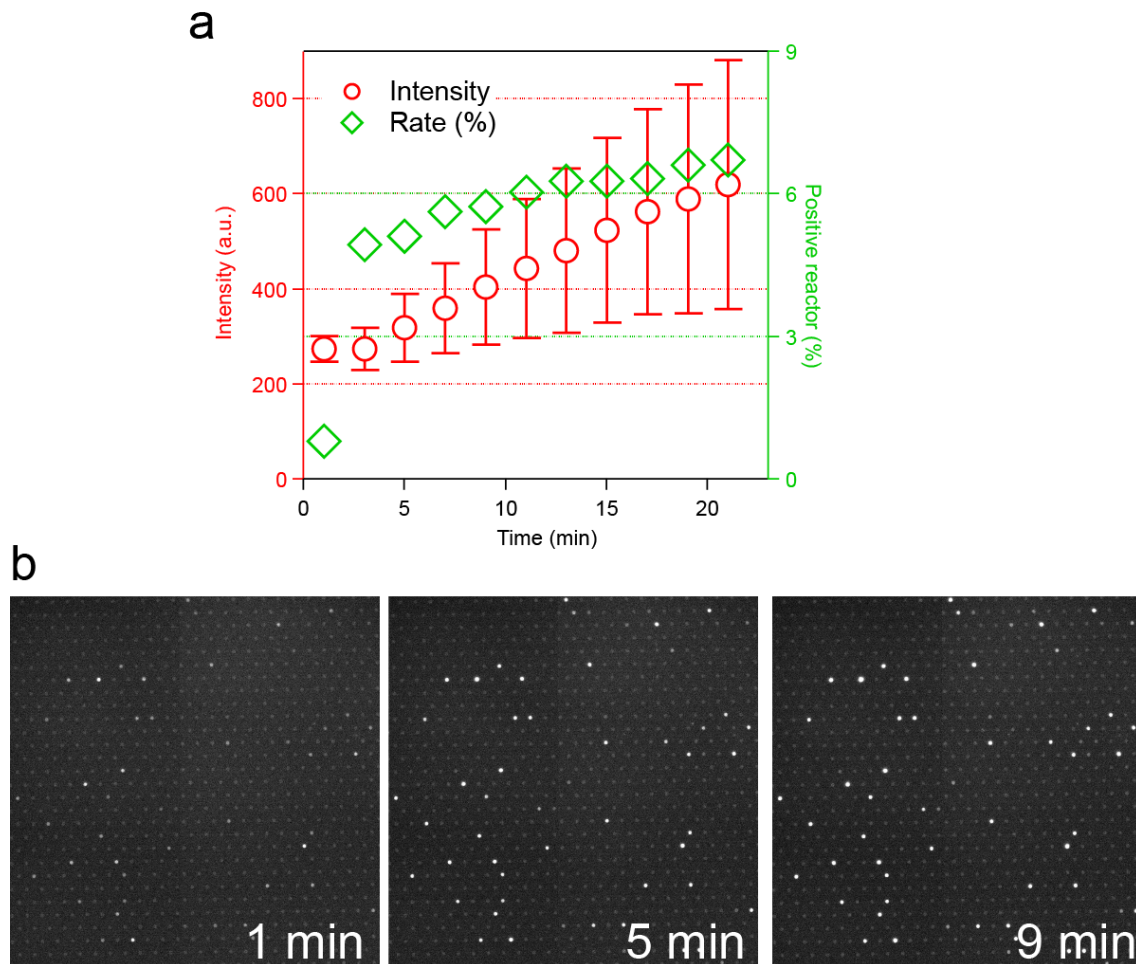

**Supplemental Fig. 7. Time course of the fluorescent signal of DIViC**

**a.** The time course of fluorescence signal of positive reactors that displayed a fluorescence signal exceeding the threshold value ( $\text{mean} \pm 15 \times \text{SD}$ ) at the indicated incubation time. Each data point represents an averaged value with standard error. Right axis indicates the corresponding the fraction (%) of the positive reactors. Assays were initiated by mixing samples followed by incubation at room temperature: influenza type A virus (A/PR/8/1934(H1N1)) at  $1.0 \times 10^6$  PFU/mL and MUNANA, and immediately observed using a microscope for time-lapse imaging. **b.** Fluorescent images after 1, 5 and 9 min of incubation.
